# Supplementary material for: Comparative Analysis of Two Candida parapsilosis Isolates Originating from the Same Patient Harbouring the Y132F and R398I Mutations in the ERG11 Gene
Source: Cells. 2023 Jun 7;12(12):1579. doi: 10.3390/cells12121579 (PMC10296954; doi:10.3390/cells12121579)
Supplement: Supplementary file 1 [file cells-12-01579-s001.zip › cells-2311022-supplementary.pdf]

# Comparative analysis of two *Candida parapsilosis* isolates from the patient with a central venous catheter harbouring the Y132F and R398I mutations in the *ERG11* gene

Matúš Štefánek <sup>1</sup>, Martina Garaiová <sup>2</sup>, Adam Valček <sup>3</sup>, Luisa Jordao <sup>4</sup> and Helena Bujdaková <sup>1,\*</sup>

<sup>1</sup> Department of Microbiology and Virology, Faculty of Natural Sciences, Comenius University in Bratislava, 842 15 Bratislava, Slovakia; stefanek8@uniba.sk, valcekam@gmail.com, helena.bujdakova@uniba.sk,

<sup>2</sup> Institute of Animal Biochemistry and Genetics, Centre of Biosciences, Slovak Academy of Sciences, Dúbravská cesta 9, 840 05 Bratislava, Slovakia; martina.garaiova@savba.sk

<sup>3</sup> Research and Development Unit, Department of Environmental Health, National Institute of Health Dr Ricardo Jorge, 1649-016 Lisboa, Portugal; maria.jordao@insa.min-saude.pt

\* Correspondence: helena.bujdakova@uniba.sk; Tel.: +421 2 9014 9436

**Table S1.** Oligonucleotides sequences used in the study.

| Name        |         | Sequence             | Reference                      |
|-------------|---------|----------------------|--------------------------------|
| <i>ACT1</i> | forward | CGAACGTGGTTACGGTTTCT | Neji <i>et al.</i> , 2017 [42] |
|             | reverse | TGACCATCTGGCAATTCGTA |                                |
| <i>ERG9</i> | forward | ACTTCGAGATCATTGCGGC  | This study                     |
|             | reverse | TCCTCTCAACAATGGCACCT |                                |
| <i>ERG6</i> | forward | GTACAGTCGTGAAGTTGCCG | This study                     |
|             | reverse | ATCCAACAGCTTCCGTGGTA |                                |
| <i>LIP2</i> | forward | CACGGTACCTTGGATGCAAT | This study                     |
|             | reverse | ATCCAAGTCAAAGCAGCTGG |                                |

## Construction of growth curve

The growth of all strains was characterized by growth curve measured for every h on a microplate reader (MRX II Microplate reader, Dynex Technologies, Chantilly, VA, USA) at OD<sub>600</sub> for total 8 h. From overnight culture grown at YPD agar plate at 30 °C, a starting inocula (OD<sub>600</sub> = 0.02) were set up in 20 mL of YPD broth and cultivated on a thermal shaker (150 rpm; Thermostatic cabinet, Lovibonds, Biosan, Riga, Latvia) at 30 °C. The growth of HC isolate was boosted in the presence of FLC apart from CDC317 and CVC, starting from 4-h mark with higher differences observed in subsequent measurements. The highest grow rate was observed in *C. parapsilosis* HC in the presence of FLC.

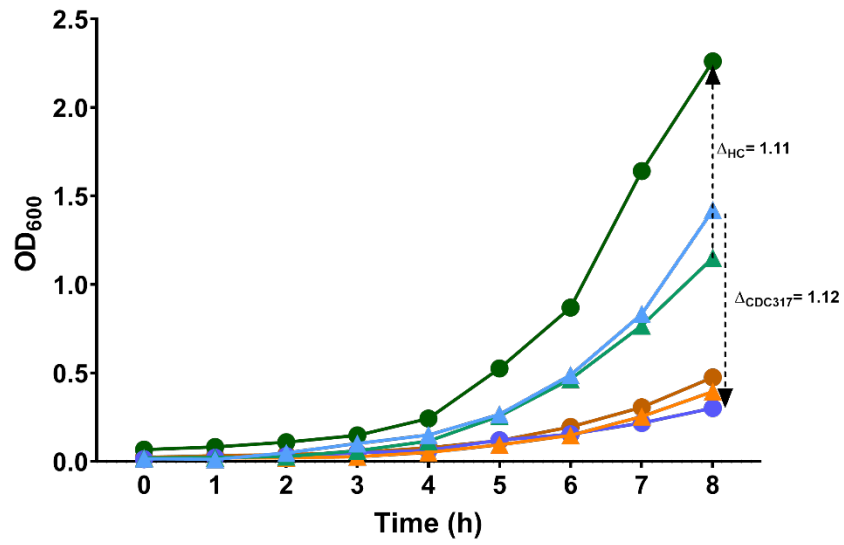

★ *C. parapsilosis* CDC317 -F    ★ *C. parapsilosis* HC -F    ★ *C. parapsilosis* CVC -F  
 ● *C. parapsilosis* CDC317 +F    ● *C. parapsilosis* HC +F    ● *C. parapsilosis* CVC +F

**Supplementary Figure S1.** Growth curves of *C. parapsilosis*, CDC317, HC and CVC with (samples marked as +F) and without (samples marked as -F) presence of 2  $\mu$ g/mL of FLC.
